# Supplementary material
Source: publisher site journal article supplement (https://www.dovepress.com/article/442959)
Supplement: Supplementary file 1 [file get_supplementary_file.php]

1 **SUPPLEMENTAL MATERIAL**

2

3

4

5 **Contents**

6 Supplementary Material 1 Supplemental methods..... 2

7 Table S1 Listing of systemic glucocorticoids contributing to exposure data ..... 3

8 Table S2 Conditions of interest ..... 4

9 Table S3 Handling of missing prescription attribute data ..... 6

10 Table S4 European Medicines Agency approval dates for biologic therapies ..... 8

11 Table S5 Forum for reducing Oral Corticosteroid Use in Severe asthma (FOCUS) International Working  
12 Group members ..... 9

13 Figure S1 Average total SGC dose per course.. ..... 10

14 Figure S2 Percentage of patients prescribed SGC by average prescribed daily dose category..... 11

15 Figure S3 Average total SGC dose prescribed per year.. ..... 12

16 Total SGC dose per year for asthma, severe asthma, Crohn’s disease, ulcerative colitis, rheumatoid  
17 arthritis, and systemic lupus erythematosus. European Medicines Agency’s approval of the first biologic  
18 therapy during the observation period is marked by a vertical line. .... 12

19 Figure S4 Number of patients who met study inclusion criteria per year by sex..... 13

20 Figure S5 Relative contribution of 27 conditions of interest to total SGC prescriptions (top) and total  
21 SGC dose (bottom) per analysis year.. ..... 14

22

23

24 **Supplementary Material 1: Supplemental methods**

25 **Exclusion criteria**

26 Patients were excluded from the study population if they were diagnosed with adrenal insufficiency or  
27 hypopituitarism at any time point, except those with traumatic disease onset (eg, postradiotherapy  
28 hypopituitarism), in which case they were excluded from the onset year forward. Patients diagnosed with cancer  
29 were removed from the population starting from the year prior to first diagnosis.

30  
31 **Systemic glucocorticoid exposure**

32 Systemic glucocorticoid (SGC) prescriptions that occurred on the same day as a lower or upper respiratory  
33 diagnostic code, and without a diagnostic code suggesting another indication, were assumed to be for the  
34 treatment of an acute respiratory condition and were excluded from analyses of conditions other than asthma or  
35 chronic obstructive pulmonary disease. In the UK primary care setting, glucocorticoids administered via injection  
36 are generally local rather than systemic and were excluded from analyses of conditions other than those for which  
37 SGC injections are commonly used: multiple sclerosis, psoriatic arthritis, and rheumatoid arthritis.

38  
39 **Definition of severe asthma**

40 Patients with severe asthma were identified by a prescription in the analysis year for medium-dose inhaled  
41 corticosteroids with a long-acting  $\beta$ -agonist and/or a leukotriene receptor antagonist, high-dose inhaled  
42 corticosteroids, biologic therapies, or long-term SGC.

43  
44 **Systemic glucocorticoid utilization metrics**

45 Variables assessed included the percentage of patients prescribed SGC, average number of prescriptions per  
46 year, percentage of patients by the average total yearly dose category (>0 to  $\leq$ 500 mg, >500 to  $\leq$ 1000 mg, or  
47 >1000 mg), percentage of patients by average prescribed daily dose category (>0 to  $\leq$ 7.5 mg/day, >7.5 to  $\leq$ 15  
48 mg/day, or >15 mg/day), and average total dose per course. Dose category thresholds were derived from  
49 previous data indicating differences in adverse event risk and/or healthcare resource utilization/costs at these  
50 SGC exposure levels.<sup>1</sup>

51  
52 **Reference**

- 53 1. Price DB, Trudo F, Voorham J, et al. Adverse outcomes from initiation of systemic corticosteroids for asthma:  
54 long-term observational study. *J Asthma Allergy*. 2018;11:193–204. doi:10.2147/JAA.S176026

55 **Table S1** Listing of systemic glucocorticoids contributing to exposure data

| <b>Drug name</b>             | <b>Prednisolone<br/>equivalent<br/>conversion factor</b> | <b>ATC code<br/>systemic use</b> | <b>Defined daily<br/>dose<sup>a</sup></b> |
|------------------------------|----------------------------------------------------------|----------------------------------|-------------------------------------------|
| Betamethasone                | 6.67                                                     | H02AB01                          | 1.5                                       |
| Betamethasone, injected      | 6.67 (25 for depot)                                      | H02AB01                          | 1.5 (0.4 for depot)                       |
| Cortisone                    | 0.27                                                     | H02AB10                          | 37.5                                      |
| Deflazacort                  | 0.67                                                     | H02AB13                          | 15.0                                      |
| Dexamethasone                | 6.67                                                     | H02AB02                          | 1.5                                       |
| Hydrocortisone               | 0.33                                                     | H02AB09                          | 30.0                                      |
| Methylprednisolone           | 1.33                                                     | H02AB04                          | 7.5                                       |
| Methylprednisolone, injected | 0.50                                                     | H02AB04                          | 20.0                                      |
| Prednisolone                 | 1.00                                                     | H02AB06                          | 10.0                                      |
| Prednisolone, injected       | 1.00                                                     | H02AB06                          | 10.0                                      |
| Prednisone                   | 1.00                                                     | H02AB07                          | 10.0                                      |
| Triamcinolone                | 1.33                                                     | H02AB08                          | 7.5                                       |

56

57 **Abbreviations:** ATC, Anatomical Therapeutic Chemical classification system.

58 <sup>a</sup>The assumed average maintenance dose per day for a drug used for its main indication in adults.

59

60 **Table S2** Conditions of interest

| Disease group                                | Condition                    | Active disease definition |                          |
|----------------------------------------------|------------------------------|---------------------------|--------------------------|
|                                              |                              | Always active             | Active when criteria met |
| Respiratory system                           | Asthma                       |                           | X <sup>a</sup>           |
|                                              | COPD/bronchitis              | X                         |                          |
|                                              | Nasal polyps                 | X                         |                          |
| Circulatory system                           | Carditis                     |                           | X <sup>a</sup>           |
|                                              | Temporal arteritis           |                           | X <sup>b</sup>           |
|                                              | Vasculitis                   |                           | X <sup>a</sup>           |
| Digestive system                             | Autoimmune hepatitis         | X                         |                          |
|                                              | Crohn's disease              |                           | X <sup>a</sup>           |
|                                              | Ulcerative colitis           |                           | X <sup>a</sup>           |
| Skin and subcutaneous tissue                 | Autoimmune bullous diseases  | X                         |                          |
|                                              | Eczema/dermatitis            |                           | X <sup>b</sup>           |
|                                              | Psoriasis                    | X                         |                          |
| Musculoskeletal system and connective tissue | Ankylosing spondylitis       | X                         |                          |
|                                              | Gout                         | X                         |                          |
|                                              | Polymyalgia rheumatica       | X                         |                          |
|                                              | Rheumatoid arthritis         | X                         |                          |
|                                              | Psoriatic arthritis          |                           | X <sup>b</sup>           |
|                                              | Sjögren's syndrome           | X                         |                          |
|                                              | Systemic lupus erythematosus | X                         |                          |
| Nervous system                               | Bell's palsy                 |                           | X <sup>b</sup>           |
|                                              | Multiple sclerosis           | X                         |                          |
|                                              | Myasthenia gravis            |                           | X <sup>b,c</sup>         |
| Eye and adnexa                               | Iritis                       |                           | X <sup>b</sup>           |
|                                              | Scleritis                    |                           | X <sup>b</sup>           |
|                                              | Uveitis                      |                           | X <sup>b</sup>           |
| Genitourinary system                         | Nephrotic syndrome           |                           | X <sup>b</sup>           |
| Miscellaneous, involving the immune system   | Sarcoidosis                  |                           | X <sup>a</sup>           |

61

62 **Abbreviation:** COPD, chronic obstructive pulmonary disease.63 <sup>a</sup>The condition was considered active if the patient had a relevant diagnostic code at any time and medication in

- 64 the analysis year and/or the patient had a relevant diagnostic code in the analysis year.
- 65 <sup>b</sup>In order to be considered active, the diagnostic code must have occurred in the analysis year.
- 66 <sup>c</sup>The condition is not considered always active because thymectomy can reduce the need for medication.

**Table S3** Handling of missing prescription attribute data

---

|                                                 |                                                                                                                                                                                                                                                                                                                                                                                                                                                                                                                                                                                                                                                                                                                                                    |
|-------------------------------------------------|----------------------------------------------------------------------------------------------------------------------------------------------------------------------------------------------------------------------------------------------------------------------------------------------------------------------------------------------------------------------------------------------------------------------------------------------------------------------------------------------------------------------------------------------------------------------------------------------------------------------------------------------------------------------------------------------------------------------------------------------------|
| <b>Missing route</b>                            | <p>Two types of glucocorticoids are typically topical: hydrocortisone and betamethasone. Because topical steroids are not included in this analysis, when the route was not explicitly provided for hydrocortisone or betamethasone, the prescription was excluded.</p> <p>For the other glucocorticoids in this study (cortisone, deflazacort, dexamethasone, methylprednisolone, prednisolone, prednisone, and triamcinolone), the following sequence was followed until a value was found:</p> <ul style="list-style-type: none"><li>• Use modal route of the same drug at the patient level</li><li>• Use modal route of the same drug at the population level</li></ul>                                                                       |
| <b>Missing strength</b>                         | <p>The following sequence was followed until a value was found:</p> <ul style="list-style-type: none"><li>• Use strength of closest prescription in time, if that prescription is for the same drug and route, limited to within 1 year</li><li>• Use modal strength of the same drug and route at the patient level</li><li>• Use modal strength of the same drug and route at the population level</li></ul>                                                                                                                                                                                                                                                                                                                                     |
| <b>Missing quantity</b>                         | <p>The following sequence was followed until a value was found:</p> <ul style="list-style-type: none"><li>• Use quantity of closest prescription in time, if that prescription is for the same drug, strength, and route, limited to within 1 year</li><li>• Use modal quantity of the same drug, strength, and route at the patient level</li><li>• Use quantity of closest prescription in time, if that prescription is for the same drug and route, limited to within 1 year</li><li>• Use modal quantity of the same drug and route at the patient level</li><li>• Use modal quantity of the same drug, strength, and route at the population level</li><li>• Use modal quantity of the same drug and route at the population level</li></ul> |
| <b>Missing dosing instructions (daily dose)</b> | <p>This sequence was followed until a value was found:</p> <ul style="list-style-type: none"><li>• Use daily dose of closest prescription in time, if that prescription is for the same drug, strength, and route, limited to within 1 year</li><li>• Use modal daily dose of the same drug, strength, and route at the patient level</li><li>• Use daily dose of closest prescription in time, if that prescription is for the same drug and route, limited to within 1 year</li><li>• Use modal daily dose of the same drug and route at the patient level</li></ul>                                                                                                                                                                             |

---

- 
- Use modal daily dose of the same drug, strength, and route at the population level
- 

67

68

**Table S4** European Medicines Agency approval dates for biologic therapies

| Drug(s)            | Indications <sup>a</sup>                                      | EMA approval date                         |
|--------------------|---------------------------------------------------------------|-------------------------------------------|
| Abatacept          | Rheumatoid arthritis                                          | May 2007                                  |
| Adalimumab         | Crohn's disease<br>Rheumatoid arthritis<br>Ulcerative colitis | June 2007<br>September 2003<br>April 2012 |
| Anakinra           | Rheumatoid arthritis                                          | March 2002                                |
| Baricitinib        | Rheumatoid arthritis                                          | February 2017                             |
| Belimumab          | Systemic lupus erythematosus                                  | July 2011                                 |
| Benralizumab       | Asthma                                                        | January 2018                              |
| Certolizumab pegol | Rheumatoid arthritis                                          | October 2009                              |
| Etanercept         | Rheumatoid arthritis                                          | February 2000                             |
| Golimumab          | Rheumatoid arthritis<br>Ulcerative colitis                    | October 2009<br>September 2013            |
| Infliximab         | Crohn's disease<br>Rheumatoid arthritis<br>Ulcerative colitis | August 1999<br>June 2000<br>March 2006    |
| Mepolizumab        | Asthma                                                        | December 2015                             |
| Omalizumab         | Asthma                                                        | October 2005                              |
| Reslizumab         | Asthma                                                        | August 2016                               |
| Rituximab          | Rheumatoid arthritis                                          | July 2006                                 |
| Sarilumab          | Rheumatoid arthritis                                          | June 2017                                 |
| Tocilizumab        | Rheumatoid arthritis                                          | January 2009                              |
| Tofacitinib        | Rheumatoid arthritis<br>Ulcerative colitis                    | March 2017<br>August 2018                 |
| Ustekinumab        | Crohn's disease<br>Ulcerative colitis                         | November 2016<br>September 2019           |
| Vedolizumab        | Crohn's disease<br>Ulcerative colitis                         | May 2014<br>May 2014                      |

69 **Abbreviation:** EMA, European Medicines Agency.

70 <sup>a</sup>Indication listing only includes the 7 key conditions of interest. Additional approval and product information are  
71 available at [www.ema.europa.eu/en/medicines](http://www.ema.europa.eu/en/medicines)

72



73 **Table S5** Forum for reducing Oral Corticosteroid Use in Severe asthma (FOCUS) International Working Group  
 74 members  
 75

| <b>Country</b> | <b>Member(s)</b>                                                                                                                       |
|----------------|----------------------------------------------------------------------------------------------------------------------------------------|
| Argentina      | Jorge F. Máspero, MD                                                                                                                   |
| Australia      | John W. Upham, MBBS, PhD                                                                                                               |
| Austria        | Josef Smolen, MD                                                                                                                       |
| Canada         | Kenneth R. Chapman, MSc, MD<br>J. Mark FitzGerald, MD                                                                                  |
| France         | Arnaud Bourdin, MD, PhD                                                                                                                |
| Italy          | Giorgio Walter Canonica, MD                                                                                                            |
| Singapore      | David Price, FRCGP (Chair)                                                                                                             |
| South Korea    | Tae-bum Kim, MD, PhD                                                                                                                   |
| United Kingdom | Mark Gurnell, MBBS, MA, PhD<br>John Haughney, MBChB<br>David Jackson, MD, PhD<br>Andrew Menzies-Gow, MBBS, PhD<br>Samantha Walker, PhD |
| United States  | Eugene Bleecker, MD<br>Monica Kraft, MD<br>Tonya A. Winders                                                                            |

76

77 **Figure S1** Average total SGC dose per course.<sup>a</sup>

78 Data are for asthma, severe asthma, COPD nasal polyps, Crohn's disease, ulcerative colitis, rheumatoid arthritis,  
 79 and systemic lupus erythematosus. European Medicines Agency approval dates for biologic therapies are marked  
 80 by vertical lines.

81 **Abbreviations:** COPD, chronic obstructive pulmonary disease; Rx, prescription; SGC, systemic glucocorticoid.

82 <sup>a</sup>To minimise misattribution of an SGC indication, only one condition (mono-condition) per patient per year for  
 83 which an SGC could have been prescribed was used for these analyses.

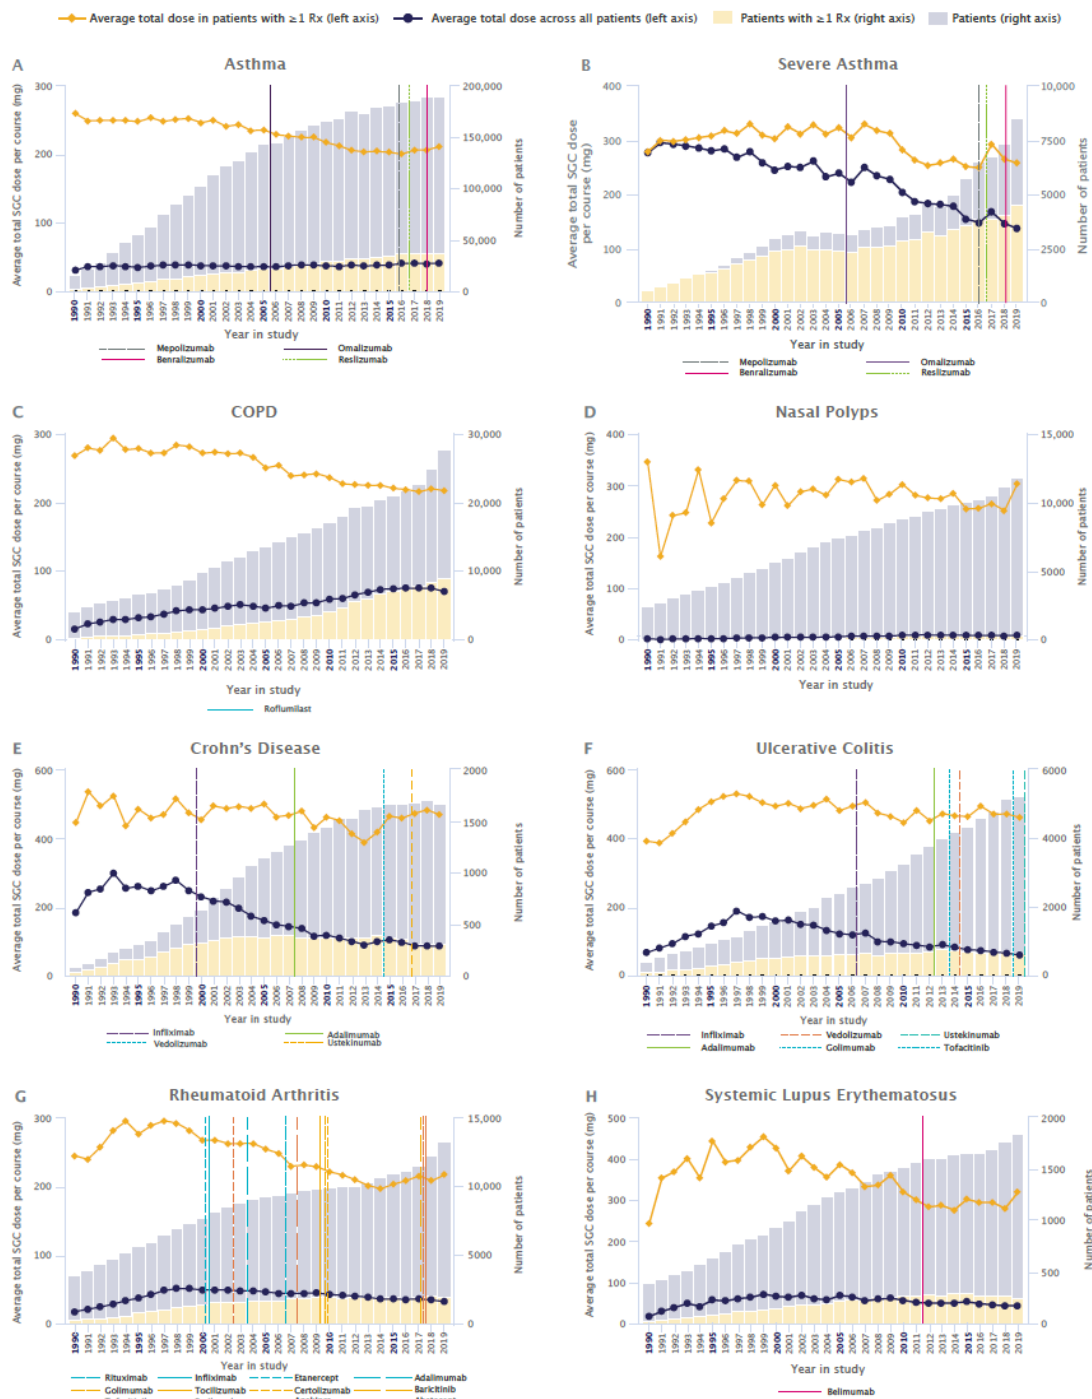

86 **Figure S2** Percentage of patients prescribed SGC by average prescribed daily dose category.<sup>a</sup>  
 87 Data are for asthma, severe asthma, COPD, nasal polyps, Crohn's disease, ulcerative colitis, rheumatoid arthritis,  
 88 and systemic lupus erythematosus. European Medicines Agency approval dates for biologic therapies are marked  
 89 by vertical lines. A different scale for the 15 mg/day category is shown on the right axis for asthma, severe  
 90 asthma, COPD, nasal polyps, and ulcerative colitis.  
 91 **Abbreviations:** COPD, chronic obstructive pulmonary disease; SGC, systemic glucocorticoid.  
 92 <sup>a</sup>In order to minimize the misattribution of an SGC indication, only 1 condition per patient per year for which an  
 93 SGC could have been prescribed was used for these analyses.

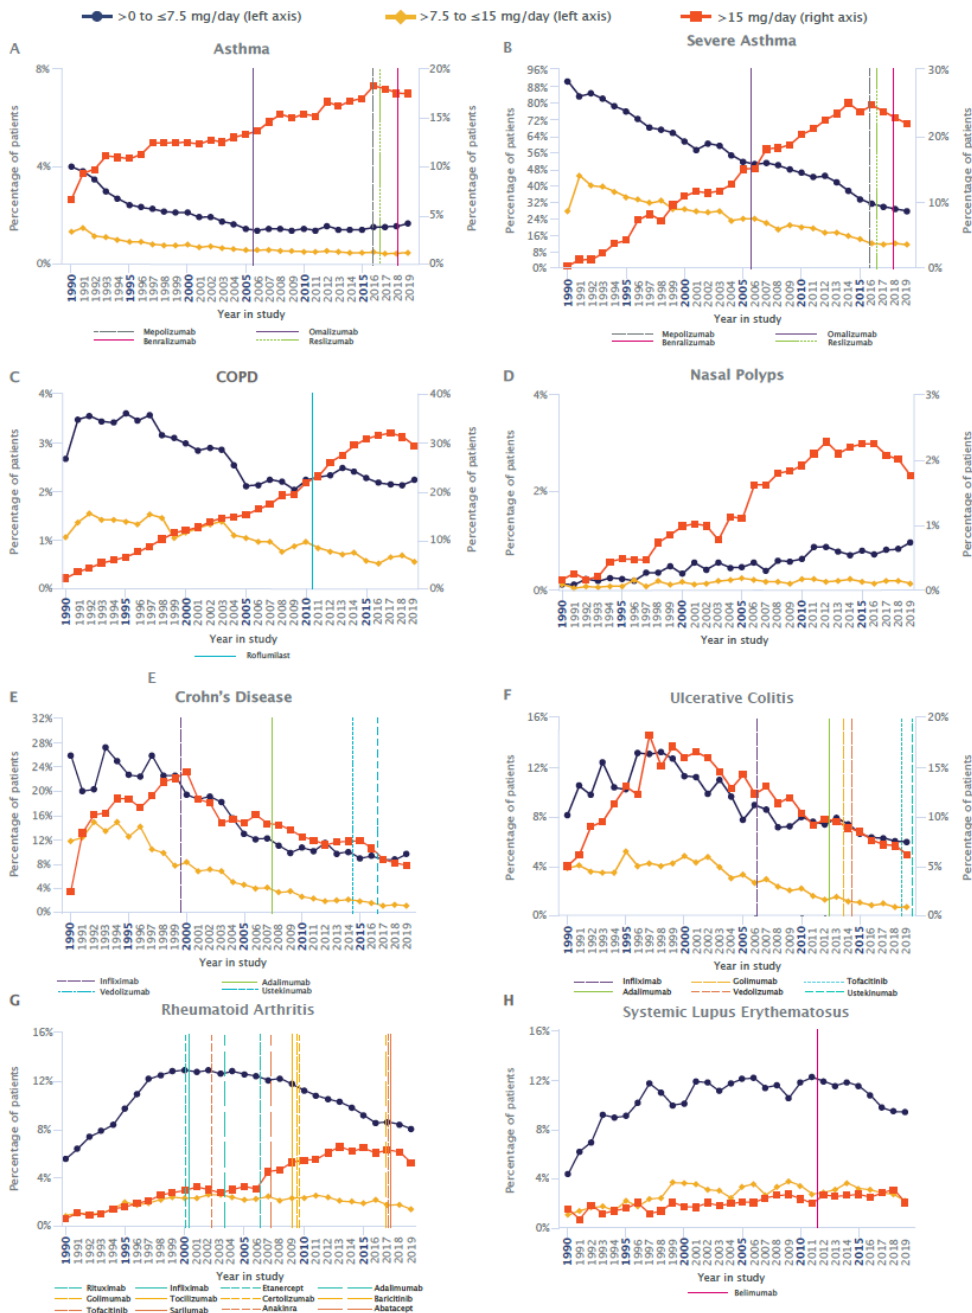

94

95 **Figure S3** Average total SGC dose prescribed per year.<sup>a</sup>

96 Total SGC dose per year for asthma, severe asthma, Crohn's disease, ulcerative colitis, rheumatoid arthritis, and  
97 systemic lupus erythematosus. European Medicines Agency's approval of the first biologic therapy during the  
98 observation period is marked by a vertical line.

99 **Abbreviation:** SGC, systemic glucocorticoid.

100 <sup>a</sup>In order to minimize misattribution of an SGC indication, only 1 condition per patient per year for which an SGC  
101 could have been prescribed was used for these analyses.

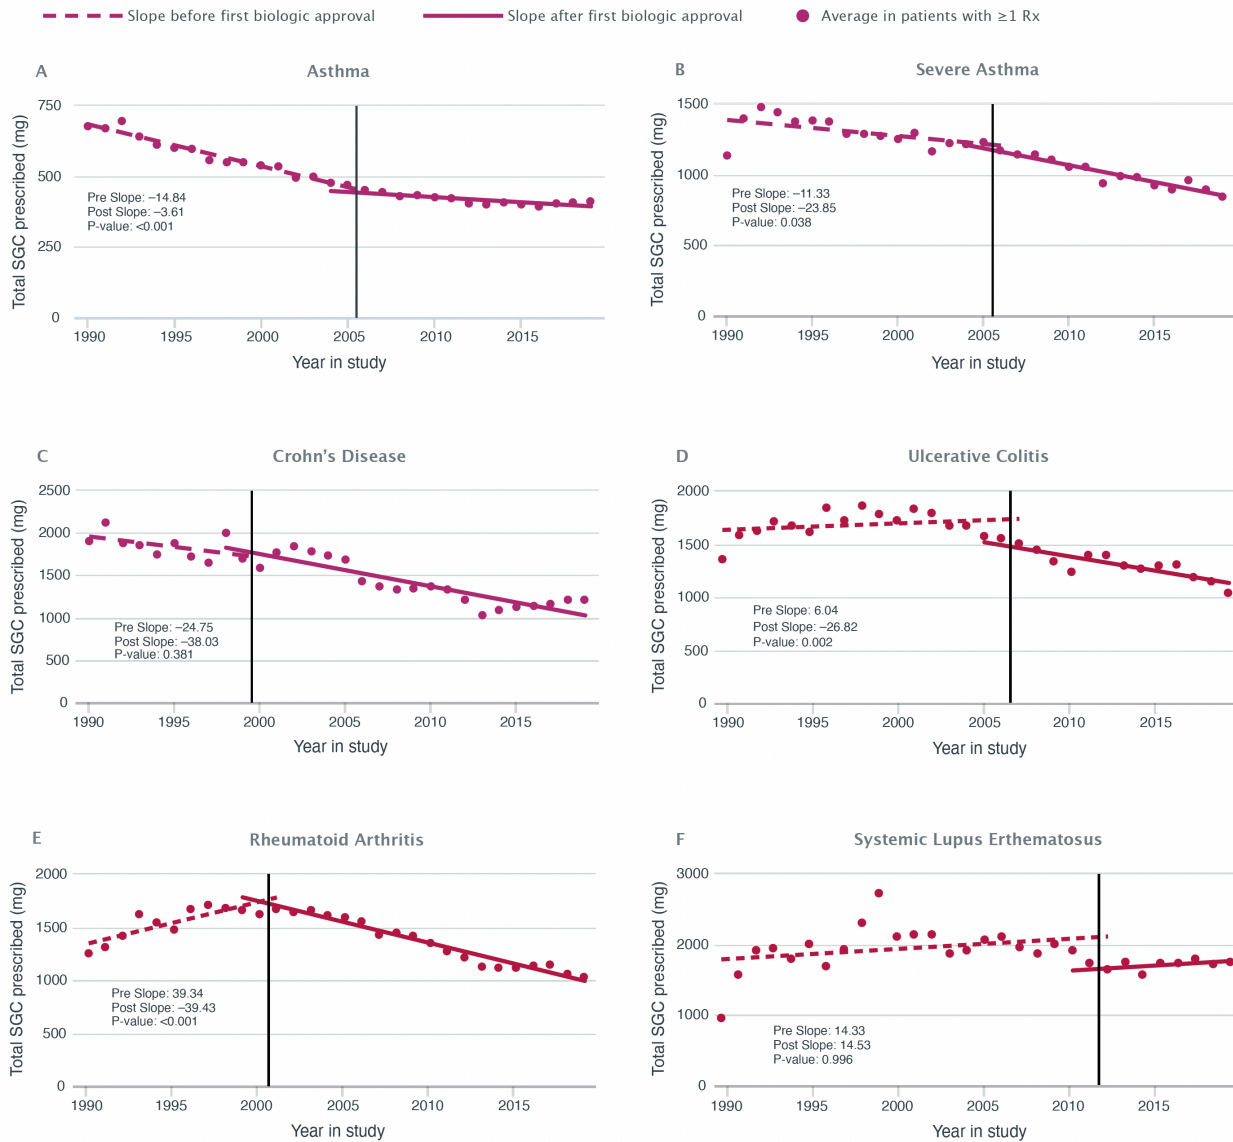

102  
103  
104  
105

106 **Figure S4** Number of patients who met study inclusion criteria per year by sex.

107

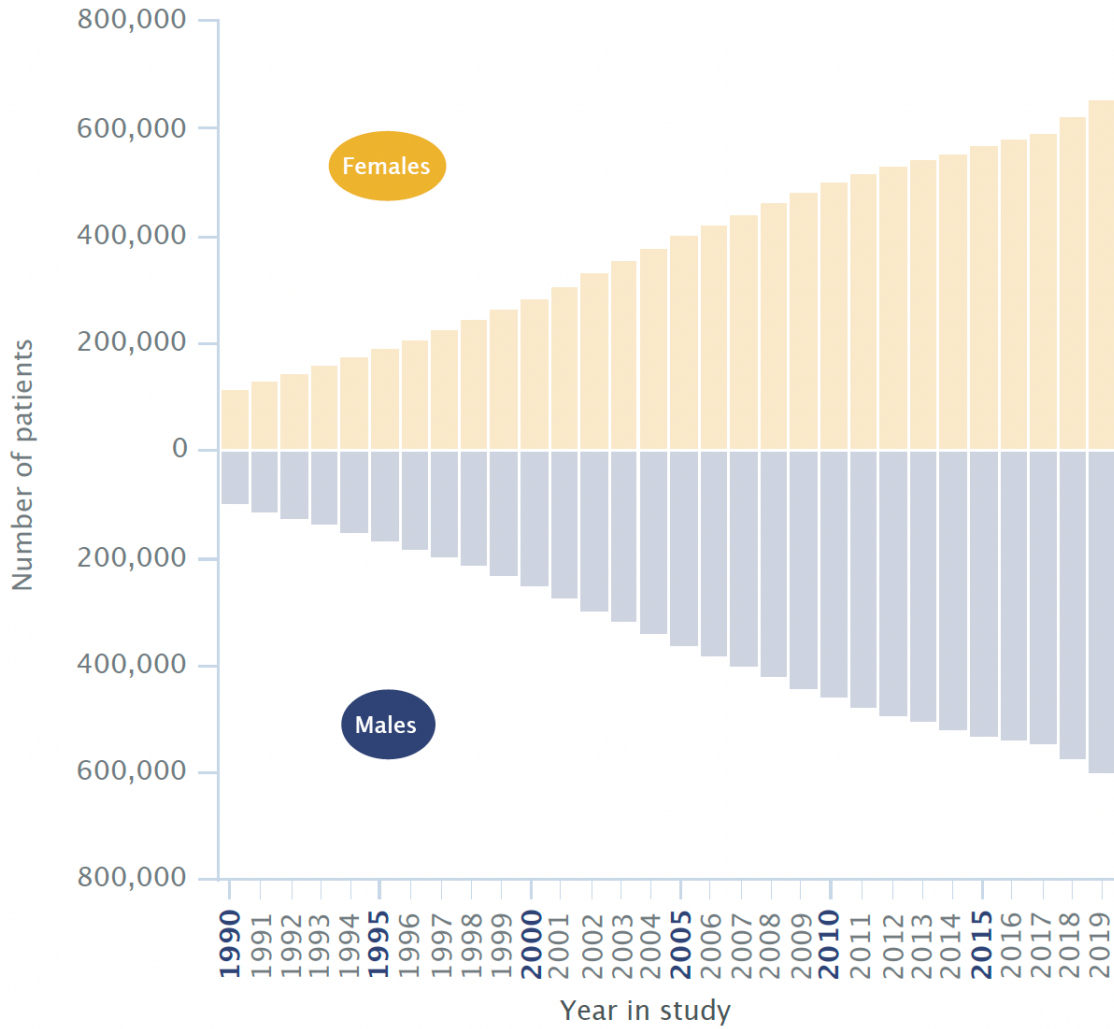

108

109

110

111 **Figure S5** Relative contribution of 27 conditions of interest to total SGC prescriptions (top) and total SGC dose (bottom) per analysis year.<sup>a</sup>

113 **Abbreviations:** COPD, chronic obstructive pulmonary disease; SGC, systemic glucocorticoid; SLE, systemic lupus erythematosus.

115 <sup>a</sup>The Other category contains SGC data from ankylosing spondylitis, myasthenia gravis, sarcoidosis, uveitis, autoimmune bullous, eczema, nephrotic syndrome, scleritis, vasculitis, autoimmune hepatitis, gout, polymyalgia, Sjögren's syndrome, Bell's palsy, iritis, psoriasis, carditis, multiple sclerosis, psoriatic arthropathy, and temporal arteritis.

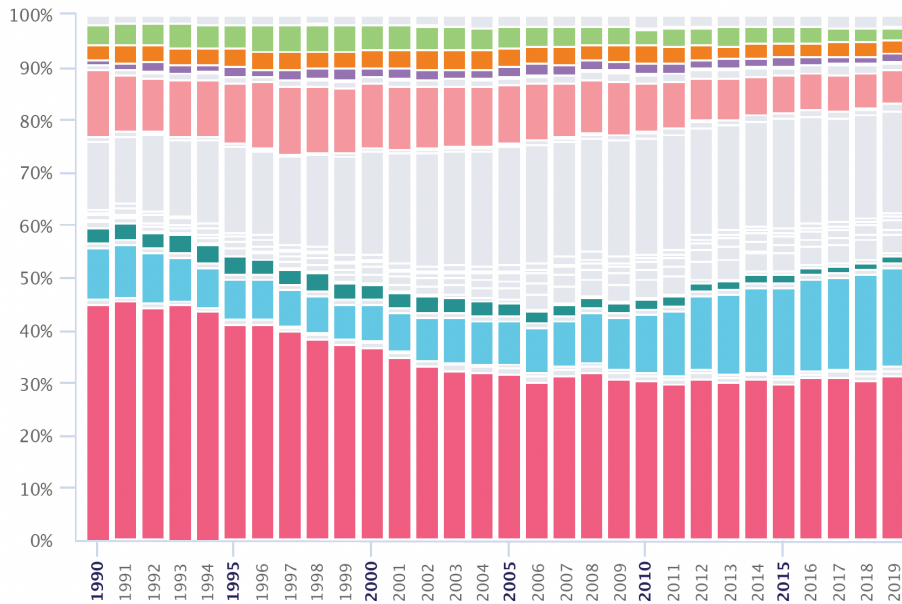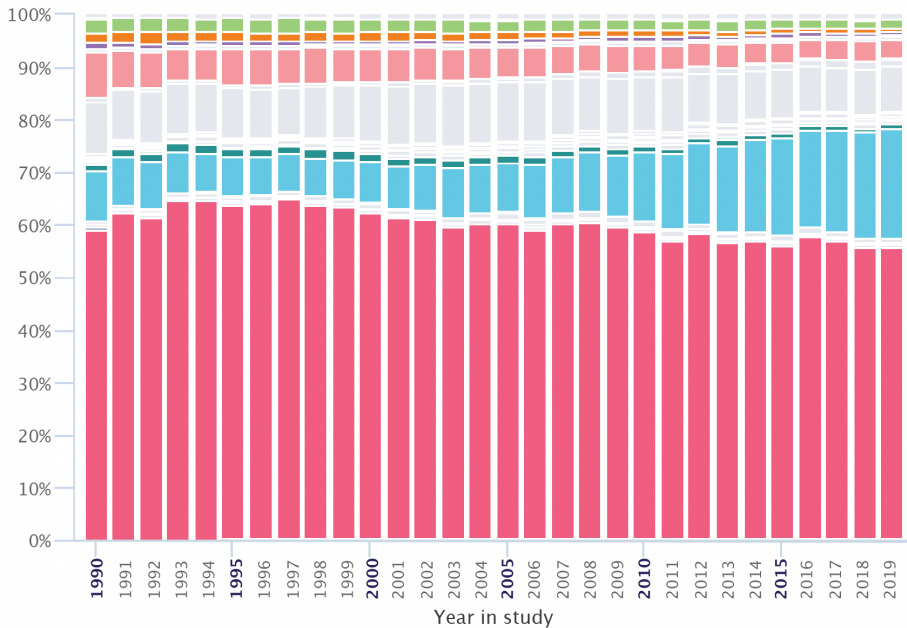

● Asthma    ● Nasal Polyps    ● Rheumatoid Arthritis    ● SLE  
 ● COPD    ● Crohns    ● Ulcerative Colitis    ● Other

119  
120
